# Supplementary material for: Biodiversity associated with restored small-scale mussel habitats has restoration decision implications
Source: Springer Nature journal article supplement (doi:10.1007/s10531-022-02462-1), 2022-08-06
Supplement: MOESM1 [file 23343906]

**Biodiversity associated with restored small-scale mussel habitats has restoration decision implications**

Emilee D. Benjamin<sup>1,2\*</sup>

Sean J. Handley<sup>2</sup>

Rachel Hale<sup>2</sup>

Trevyn A. Toone<sup>1,2</sup>

Andrew Jeffs<sup>1</sup>

Jenny R. Hillman<sup>1</sup>

<sup>1</sup>Institute of Marine Science, University of Auckland, Private Bag 92019, Auckland 1142, New Zealand

<sup>2</sup>National Institute of Water and Atmospheric Research, 217 Akersten Street, Port Nelson, Nelson 7010, New Zealand

\*Corresponding author: [egol669@aucklanduni.ac.nz](mailto:egol669@aucklanduni.ac.nz)

**Online Resource 1**

**Online Resource 1.1:** Table of the results of the repeated measure 3-way ANOVAs performed on the sediment characteristics, grain size (a. clay, b. silt, and b. coarse sand) and d. organic content. Significant *P* values are in bold.

| <b>Sediment variables: repeated measures ANOVA</b> |           |           |           |          |                |
|----------------------------------------------------|-----------|-----------|-----------|----------|----------------|
| <b>a. Clay</b>                                     |           |           |           |          |                |
|                                                    | <b>df</b> | <b>SS</b> | <b>MS</b> | <b>F</b> | <b>P</b>       |
| Addition of mussels                                | 1         | 2482.4    | 2482      | 220.525  | < <b>0.001</b> |
| Location                                           | 3         | 932       | 310.7     | 27.597   | < <b>0.001</b> |
| Sampling period                                    | 1         | 4.2       | 4.2       | 0.374    | 0.542          |
| Mussels × Location                                 | 3         | 123.4     | 41.1      | 3.655    | <b>0.015</b>   |
| Mussels × Sampling period                          | 1         | 0.5       | 0.5       | 0.041    | 0.839          |
| Location × Sampling period                         | 3         | 133.7     | 44.6      | 3.958    | <b>0.010</b>   |
| Mussel × Location × Sampling period                | 3         | 54.8      | 18.3      | 1.623    | 0.188          |
| Residuals                                          | 107       | 1204.5    | 11.3      |          |                |
| Totals                                             | 122       |           |           |          |                |
| <b>b. Silt</b>                                     |           |           |           |          |                |
| Addition of mussels                                | 1         | 18939     | 18939     | 207.212  | < <b>0.001</b> |
| Location                                           | 3         | 28878     | 9626      | 105.32   | < <b>0.001</b> |
| Sampling period                                    | 1         | 49        | 49        | 0.538    | 0.465          |
| Mussels × Location                                 | 3         | 1323      | 441       | 4.826    | <b>0.003</b>   |
| Mussels × Sampling period                          | 1         | 184       | 184       | 2.009    | 0.159          |
| Location × Sampling period                         | 3         | 677       | 226       | 2.469    | 0.065          |
| Mussel × Location × Sampling period                | 3         | 360       | 120       | 1.313    | 0.274          |
| Residuals                                          | 107       | 9779      | 91        |          |                |
| Totals                                             | 122       |           |           |          |                |
| <b>c. Coarse sand</b>                              |           |           |           |          |                |
| Addition of mussels                                | 1         | 7306      | 7306      | 125.796  | < <b>0.001</b> |
| Location                                           | 3         | 15553     | 5184      | 89.264   | < <b>0.001</b> |
| Sampling period                                    | 1         | 34        | 34        | 0.597    | 0.444          |
| Mussels × Location                                 | 3         | 2615      | 872       | 15.006   | < <b>0.001</b> |
| Mussels × Sampling period                          | 1         | 4         | 4         | 0.067    | 0.796          |
| Location × Sampling period                         | 3         | 200       | 67        | 1.149    | 0.333          |
| Mussel × Location × Sampling period                | 3         | 562       | 187       | 3.225    | <b>0.026</b>   |
| Residuals                                          | 92        | 6214      | 58        |          |                |
| Totals                                             | 107       |           |           |          |                |
| <b>d. Organic Content</b>                          |           |           |           |          |                |
| Addition of mussels                                | 1         | 559.7     | 559.7     | 97.536   | < <b>0.001</b> |
| Location                                           | 3         | 123.9     | 41.3      | 7.195    | < <b>0.001</b> |
| Sampling period                                    | 1         | 6.3       | 6.3       | 1.104    | 0.295          |
| Mussels × Location                                 | 3         | 79.1      | 26.4      | 4.597    | <b>0.004</b>   |
| Mussels × Sampling period                          | 1         | 4.3       | 4.300     | 0.744    | 0.390          |
| Location × Sampling period                         | 3         | 73.100    | 24.4      | 4.248    | <b>0.007</b>   |
| Mussel × Location × Sampling period                | 3         | 1.5       | 0.5       | 0.089    | 0.966          |
| Residuals                                          | 107       | 711.5     | 5.7       |          |                |
| Totals                                             | 122       |           |           |          |                |

**Online Resource 1.2:** Table of the results of PERMANOVAs based on Bray- Curtis dissimilarities for the three faunal classifications a. infauna, b. epifauna, c. pelagic fauna. Significant *P* values are in bold.

| PERMANOVA                            |     |        |        |        |              |
|--------------------------------------|-----|--------|--------|--------|--------------|
| Source                               | df  | SS     | MS     | F      | P            |
| <b>a. Infauna</b>                    |     |        |        |        |              |
| Location                             | 3   | 6.817  | 2.272  | 9.620  | <b>0.001</b> |
| Addition of mussels                  | 1   | 3.776  | 3.776  | 15.986 | <b>0.001</b> |
| Sampling period                      | 1   | 1.225  | 1.225  | 5.186  | <b>0.001</b> |
| Location × Mussels                   | 3   | 2.848  | 0.949  | 4.019  | <b>0.001</b> |
| Location × Sampling period           | 3   | 2.071  | 0.691  | 2.923  | <b>0.001</b> |
| Mussels × Sampling period            | 1   | 0.705  | 0.705  | 2.986  | <b>0.001</b> |
| Location × Mussels × Sampling period | 3   | 1.060  | 0.354  | 1.510  | <b>0.010</b> |
| Residuals                            | 121 |        |        |        |              |
| Total                                | 136 |        |        |        |              |
| <b>b. Epifauna</b>                   |     |        |        |        |              |
| Location                             | 3   | 4.376  | 1.458  | 13.776 | <b>0.001</b> |
| Addition of mussels                  | 1   | 1.144  | 1.144  | 10.805 | <b>0.001</b> |
| Sampling period                      | 1   | 0.209  | 0.209  | 1.975  | 0.088        |
| Location × Mussels                   | 3   | 3.005  | 1.002  | 9.460  | <b>0.001</b> |
| Location × Sampling period           | 3   | 0.658  | 0.219  | 2.070  | <b>0.015</b> |
| Mussels × Sampling period            | 1   | 0.263  | 0.263  | 2.485  | <b>0.024</b> |
| Location × Mussels × Sampling period | 3   | 0.558  | 0.186  | 1.755  | <b>0.039</b> |
| Residuals                            | 29  | 3.070  | 0.106  |        |              |
| Total                                | 44  | 13.282 |        |        |              |
| <b>c. Pelagic fauna</b>              |     |        |        |        |              |
| Location                             | 1   | 0.5847 | 0.5847 | 5.1978 | <b>0.005</b> |
| Addition of mussels                  | 1   | 0.8957 | 0.8958 | 7.963  | <b>0.001</b> |
| Sampling period                      | 1   | 1.3167 | 1.3167 | 11.705 | <b>0.001</b> |
| Location × Mussels                   | 1   | 0.3751 | 0.3751 | 3.3349 | <b>0.018</b> |
| Location × Sampling period           | 1   | 0.7599 | 0.7599 | 6.7553 | <b>0.002</b> |
| Mussels × Sampling period            | 1   | 0.2252 | 0.2252 | 2.0022 | 0.074        |
| Location × Mussels × Sampling period | 1   | 0.2325 | 0.2325 | 2.067  | 0.081        |
| Residuals                            | 15  | 1.6873 | 0.1125 |        |              |
| Total                                | 22  | 6.0772 |        |        |              |

**Online Resource 1.3:** Table of the linear mixed effects model results for the three faunal classifications a. infauna, b. epifauna, c. pelagic fauna. Significant *P* values are in bold.

| Linear mixed models                  |    |                |                |                |                |
|--------------------------------------|----|----------------|----------------|----------------|----------------|
| a. Infauna                           |    |                |                |                |                |
|                                      |    | Abundance      | Diversity      | Richness       | Evenness       |
|                                      | df | <i>P</i>       | <i>P</i>       | <i>P</i>       | <i>P</i>       |
| Addition of mussels                  | 4  | < <b>0.001</b> | < <b>0.001</b> | < <b>0.001</b> | < <b>0.001</b> |
| Location                             | 6  | < <b>0.001</b> | < <b>0.001</b> | < <b>0.001</b> | < <b>0.001</b> |
| Sampling period                      | 1  | <b>0.001</b>   | <b>0.016</b>   | < <b>0.001</b> | 0.119          |
| Mussels × Location                   | 3  | 0.19           | <b>0.003</b>   | <b>0.005</b>   | < <b>0.001</b> |
| Mussels × Sampling Period            | 1  | <b>0.026</b>   | 0.297          | < <b>0.001</b> | 0.139          |
| Location x Sampling Period           | 3  | 0.242          | 0.238          | <b>0.044</b>   | <b>0.005</b>   |
| Mussels x Location x Sampling Period | 3  | 0.636          | 0.48           | 0.181          | 0.161          |
| b. Epifauna                          |    |                |                |                |                |
| Addition of mussels                  | 1  | <b>0.036</b>   | <b>0.038</b>   | 0.105          | 0.489          |
| Location                             | 3  | <b>0.036</b>   | <b>0.004</b>   | 0.149          | 0.605          |
| Sampling period                      | 1  | 0.987          | 0.309          | 0.339          | 0.587          |
| Mussels × Location                   | 3  | < <b>0.001</b> | <b>0.013</b>   | <b>0.044</b>   | < <b>0.001</b> |
| Mussels × Sampling Period            | 1  | 0.075          | 0.911          | 0.309          | 0.189          |
| Location x Sampling Period           | 3  | 0.24           | 0.625          | 0.451          | 0.266          |
| Mussels x Location x Sampling Period | 3  | 0.125          | 0.102          | 0.649          | <b>0.054</b>   |
| c. Pelagic Fauna                     |    |                |                |                |                |
| Addition of mussels                  | 1  | 0.716          | 0.946          | 0.721          | 0.708          |
| Location                             | 1  | <b>0.018</b>   | 0.667          | < <b>0.001</b> | 0.193          |
| Sampling period                      | 1  | <b>0.008</b>   | 0.082          | <b>0.010</b>   | 0.054          |
| Mussels × Location                   | 1  | 0.190          | 0.269          | 0.571          | 0.874          |
| Mussels × Sampling Period            | 1  | 0.488          | 0.189          | 0.095          | 0.624          |
| Location x Sampling Period           | 1  | <b>0.016</b>   | 0.156          | <b>0.002</b>   | <b>0.008</b>   |
| Mussels x Location x Sampling Period | 1  | 0.260          | 0.255          | <b>0.030</b>   | 0.540          |
