# Supplementary material for: Biodiversity associated with restored small-scale mussel habitats has restoration decision implications
Source: Springer Nature journal article supplement (doi:10.1007/s10531-022-02462-1), 2022-08-06
Supplement: MOESM2 [file 23343906]

**Biodiversity associated with restored small-scale mussel habitats has restoration decision implications**

Emilee D. Benjamin<sup>1,2\*</sup>

Sean J. Handley<sup>2</sup>

Rachel Hale<sup>2</sup>

Trevyn A. Toone<sup>1,2</sup>

Andrew Jeffs<sup>1</sup>

Jenny R. Hillman<sup>1</sup>

<sup>1</sup>Institute of Marine Science, University of Auckland, Private Bag 92019, Auckland 1142, New Zealand

<sup>2</sup>National Institute of Water and Atmospheric Research, 217 Akersten Street, Port Nelson, Nelson 7010, New Zealand

\*Corresponding author: [egol669@aucklanduni.ac.nz](mailto:egol669@aucklanduni.ac.nz)

**Online Resource 2**

**Online Resource 2.1:** Table of the total of all identified infauna on the restored and control plots.

| Group         | Infauna taxa                      | Restored Plots | Control Plots |
|---------------|-----------------------------------|----------------|---------------|
| Anthozoa      | Unidentified Anemone              | 0              | 3             |
| Ascidacea     | <i>Cnemidocarpa bicornuta</i>     | 0              | 3             |
| Ascidacea     | <i>Molgula amokurae</i>           | 0              | 2             |
| Ascidacea     | <i>Cnemidocarpa nisiotis</i>      | 0              | 1             |
| Asteroidea    | <i>Patiriella regulatis</i>       | 3              | 2             |
| Bivalvia      | <i>Neilo australis</i>            | 1              | 0             |
| Bivalvia      | <i>Theora indet.</i>              | 81             | 68            |
| Bivalvia      | <i>Scintillona zelandica</i>      | 12             | 27            |
| Bivalvia      | <i>Tawera spissa</i>              | 4              | 60            |
| Bivalvia      | <i>Corbula zelandica</i>          | 12             | 48            |
| Bivalvia      | <i>Leptomya retiaria retiaria</i> | 14             | 67            |
| Bivalvia      | <i>Linucula hartvigiana</i>       | 33             | 93            |
| Bivalvia      | <i>Gari indet.</i>                | 0              | 21            |
| Bivalvia      | <i>Purpurocardia purpurata</i>    | 0              | 12            |
| Bivalvia      | <i>Limaria orientalis</i>         | 0              | 3             |
| Bivalvia      | <i>Arthritica indet.</i>          | 1              | 3             |
| Bivalvia      | <i>Diplodonta indet.</i>          | 0              | 24            |
| Bivalvia      | <i>Musculus impactus</i>          | 0              | 1             |
| Bivalvia      | <i>Ennucula strangei</i>          | 1              | 0             |
| Bivalvia      | Unidentified bivalve              | 6              | 5             |
| Bivalvia      | <i>Venerupis largillierti</i>     | 0              | 10            |
| Bivalvia      | Ungalinidae (family)              | 0              | 12            |
| Bivalvia      | <i>Melliteryx parva</i>           | 1              | 0             |
| Bivalvia      | <i>Pseudacapagia disculus</i>     | 1              | 0             |
| Bivalvia      | <i>Ruditepes largillierti</i>     | 0              | 3             |
| Bivalvia      | <i>Borniola reniformis</i>        | 0              | 3             |
| Chiridota     | <i>Chiridota nigra</i>            | 1              | 16            |
| Leptocardii   | Unidentified Lancelet             | 0              | 1             |
| Crustacea     | Unidentified Amphipod             | 67             | 262           |
| Crustacea     | Unidentified Cumacea              | 21             | 27            |
| Crustacea     | <i>Peridimenes indet.</i>         | 1              | 1             |
| Crustacea     | Unidentified Tanaid               | 1              | 71            |
| Crustacea     | Unidentified Ostracod             | 0              | 27            |
| Gastropoda    | <i>Sigapatella indet.</i>         | 1              | 2             |
| Gastropoda    | <i>Neoguraleus sinclairi</i>      | 0              | 1             |
| Gastropoda    | <i>Coelotrochus tiaratus</i>      | 0              | 2             |
| Gastropoda    | <i>Turritellidae (family)</i>     | 2              | 11            |
| Gastropoda    | <i>Buccinulum linea</i>           | 0              | 2             |
| Gastropoda    | <i>Turbonilla zelandica</i>       | 0              | 7             |
| Gastropoda    | <i>Turbonilla indet.</i>          | 0              | 1             |
| Gastropoda    | <i>Turbo smmargadus</i>           | 1              | 0             |
| Gastropoda    | <i>Eatoniella indet.</i>          | 1              | 3             |
| Gastropoda    | <i>Maoricolpus roseus</i>         | 2              | 4             |
| Gastropoda    | Unidentified limpet               | 1              | 0             |
| Holothuroidea | <i>Scoliorhapis indet.</i>        | 1              | 5             |
| Holothuroidea | <i>Australostichopus mollis</i>   | 1              | 0             |

|                |                                     |     |     |
|----------------|-------------------------------------|-----|-----|
| Holothuroidea  | <i>Taeniogyrus dendyi</i>           | 0   | 2   |
| Holothuroidea  | Holothuroidea                       | 4   | 42  |
| Isopoda        | Unidentified Isopod                 | 2   | 8   |
| Leptostraca    | Unidentified Leptostraca            | 9   | 10  |
| Malacostraca   | <i>Pagurus indet.</i>               | 5   | 32  |
| Malacostraca   | Unidentified Mysidacea              | 2   | 5   |
| Malacostraca   | <i>Halicarcinus indet.</i>          | 12  | 24  |
| Malacostraca   | <i>Hemiplax hertipes</i>            | 9   | 3   |
| Malacostraca   | <i>Nepinnotheres novaezelandiae</i> | 0   | 1   |
| Malacostraca   | Unidentified Malacostraca           | 0   | 6   |
| Malacostraca   | <i>Upogebia hirtifrons</i>          | 0   | 8   |
| Nemertea       | Nemertea                            | 1   | 25  |
| Nemotoda       | Nemotoda                            | 0   | 18  |
| Oligochaeta    | Oligochaeta                         | 3   | 96  |
| Ophiuroidea    | Amphiuridae (family)                | 2   | 61  |
| Ophiuroidea    | <i>Ophopteris indet.</i>            | 1   | 0   |
| Polychaeta     | Capitellidae                        | 255 | 459 |
| Polychaeta     | Spionidae                           | 277 | 291 |
| Polychaeta     | Lumbrineridae                       | 34  | 337 |
| Polychaeta     | Dorvilleidae                        | 23  | 26  |
| Polychaeta     | Oweniidae                           | 0   | 2   |
| Polychaeta     | Goniadidae                          | 2   | 75  |
| Polychaeta     | Hesionidae                          | 1   | 25  |
| Polychaeta     | Nereidae                            | 1   | 2   |
| Polychaeta     | Polynoidae                          | 0   | 9   |
| Polychaeta     | Sigalionidae                        | 0   | 2   |
| Polychaeta     | Syllidae                            | 19  | 165 |
| Polychaeta     | Glyceridae                          | 11  | 76  |
| Polychaeta     | Phyllodocidae                       | 5   | 4   |
| Polychaeta     | Sabellidae                          | 1   | 17  |
| Polychaeta     | Cossuridae                          | 0   | 3   |
| Polychaeta     | Maldanidae                          | 3   | 141 |
| Polychaeta     | Opheliidae                          | 57  | 102 |
| Polychaeta     | Orbiniidae                          | 0   | 13  |
| Polychaeta     | Paraonidae                          | 23  | 109 |
| Polychaeta     | Chaetopteridae                      | 0   | 15  |
| Polychaeta     | Cirratulidae                        | 8   | 27  |
| Polychaeta     | Ampharetidae                        | 0   | 3   |
| Polychaeta     | Flabelligeridae                     | 1   | 2   |
| Polychaeta     | Pectinariidae                       | 2   | 1   |
| Polychaeta     | Terebellidae                        | 5   | 22  |
| Polyplacophora | Unidentified Chiton                 | 1   | 59  |
| Polyplacophora | <i>Cryptococcus porosus</i>         | 0   | 1   |
| Sipuncula      | Sipunculidae (family)               | 1   | 11  |

**Online Resource 2.2:** Table of the total of all identified epifauna on the restored and control plots.

| <b>Epifauna taxa</b>  | <b>Mussel Plots</b> | <b>Control Plots</b> |
|-----------------------|---------------------|----------------------|
| Macroalgae            | 296                 | 158                  |
| Ascidian              | 1                   | 218                  |
| Cats eye snail        | 239                 | 44                   |
| Chiton                | 0                   | 1                    |
| Cushion sea star      | 204                 | 120                  |
| Eleven-armed sea star | 190                 | 8                    |
| Fan Worm              | 0                   | 3                    |
| Horse Mussel          | 0                   | 8                    |
| Limpet                | 3                   | 2                    |
| Orange sponge         | 1                   | 0                    |
| Sea Cucumber          | 24                  | 1                    |
| Sea urchin            | 2                   | 1                    |
| Whelk                 | 2                   | 0                    |

**Online Resource 2.3:** Table of the total of all identified pelagic fauna on the restored and control plots.

| <b>Pelagic taxa</b> | <b>Mussel Plots</b> | <b>Control Plots</b> |
|---------------------|---------------------|----------------------|
| Blue Cod            | 27                  | 8                    |
| Eagle Ray           | 3                   | 13                   |
| Garfish             | 35                  | 0                    |
| Goatfish            | 0                   | 6                    |
| Jack Mackerel       | 123                 | 295                  |
| Kahawai             | 36                  | 519                  |
| Leather Jacket      | 0                   | 1                    |
| Opalfish            | 1                   | 6                    |
| Dogfish             | 1                   | 0                    |
| Short Tail Stingray | 2                   | 11                   |
| Snapper             | 6                   | 32                   |
| Spotty              | 3970                | 5266                 |
| Stargazer           | 1                   | 0                    |
| Triplefin           | 782                 | 13                   |
